# Supplementary material
Source: PubMed Central journal article supplement (PMC6166241)

## SUPPLEMENTS

**Supplementary table 1. Blood values in C57Bl/6 mice and *Atp6v1b1*<sup>-/-</sup> mice under normal diet and HCl load for 4 days.** Data are presented as mean ± SEM, n = 5-9 animals/ group, \* p<0.05 vs baseline period in same genotype, # p<0.05 vs C57BL6 mice during the same period.

**Supplementary table 2. Body weight, food intake, and urinary values of C57BL6 mice and *Atp6v1b1*<sup>-/-</sup> mice under normal diet and during an HCl load for 4 days.** Data are presented as mean ± SEM, n = 5-9 animals/ group, \* p<0.05 vs baseline period in same genotype, # p<0.05 vs C57BL6 mice during the same period.

**Supplementary table 3. Sequences of the primers and probes used for RT-qPCR**

**Supplementary figure 1. Unchanged mRNA expression of the B1, B2 and a4 subunits of the H<sup>+</sup>-ATPase in *Rhcg*<sup>+/+</sup> and *Rhcg*<sup>-/-</sup> mice.**

RT-qPCR was performed on total kidney to determine relative mRNA levels of several H<sup>+</sup>-ATPase relevant for intercalated cell H<sup>+</sup>-ATPase function. None of the mRNA values measured of the B1 (**A**), B2 (**B**) and a4 (**C**) isoforms were different between the 2 genotypes. Values are mean ± SEM (n= 5 mice).

## Supplementary data

**Supplementary table 1. Blood values in *Atp6v1b1*<sup>+/+</sup> mice and *Atp6v1b1*<sup>-/-</sup> mice under normal diet and HCl load for 4 days**

|                         | Basal status           |                                         | 2 days HCl             |                                         | 4 days HCl             |                                         |
|-------------------------|------------------------|-----------------------------------------|------------------------|-----------------------------------------|------------------------|-----------------------------------------|
|                         | <i>C57BL6</i><br>(n=9) | <i>Atp6v1b1</i> <sup>-/-</sup><br>(n=7) | <i>C57BL6</i><br>(n=7) | <i>Atp6v1b1</i> <sup>-/-</sup><br>(n=6) | <i>C57BL6</i><br>(n=7) | <i>Atp6v1b1</i> <sup>-/-</sup><br>(n=5) |
| pH                      | 7.35 ± 0.01            | 7.40 ± 0.01                             | 7.11 ± 0.02*           | 7.15 ± 0.02*                            | 7.24 ± 0.02            | 6.87 ± 0.12 <sup>*#</sup>               |
| pCO <sub>2</sub> (mmHg) | 40.0 ± 0.6             | 40.6 ± 1.2                              | 37.3 ± 1.2             | 39.3 ± 1.5                              | 39.4 ± 1.5             | 45.4 ± 2.5 <sup>#</sup>                 |
| HCO <sub>3</sub> (mM)   | 21.6 ± 0.7             | 24.8 ± 1.2                              | 11.5 ± 0.8*            | 12.8 ± 0.6*                             | 16.4 ± 0.9*            | 8.7 ± 1.8 <sup>*#</sup>                 |
| pO <sub>2</sub>         | 52.1 ± 2.2             | 48.8 ± 2.0                              | 60.4 ± 2.4             | 62.6 ± 3.4                              | 58.4 ± 2.5             | 83.8 ± 8.7 <sup>*#</sup>                |
| Na <sup>+</sup> (mM)    | 144.6 ± 0.5            | 145.4 ± 0.3                             | 148.0 ± 1.1*           | 147.8 ± 1.5                             | 151.4 ± 0.5*           | 150.8 ± 2.4*                            |
| Cl <sup>-</sup> (mM)    | 109.7 ± 0.6            | 108.3 ± 0.7                             | 123.4 ± 1.6*           | 121.0 ± 1.5*                            | 120.0 ± 1.6*           | 133.6 ± 2.8 <sup>*#</sup>               |
| Ca <sup>2+</sup> (mM)   | 1.26 ± 0.01            | 1.23 ± 0.01                             | 1.34 ± 0.01*           | 1.33 ± 0.02*                            | 1.36 ± 0.02*           | 1.60 ± 0.1 <sup>*#</sup>                |
| Hb (g/dl)               | 15.1 ± 0.2             | 15.7 ± 0.2                              | 15.6 ± 0.3             | 16.7 ± 0.2 <sup>*#</sup>                | 15.3 ± 0.2             | 18.8 ± 1.2 <sup>*#</sup>                |

\* p<0.05 vs baseline period in same genotype, # p<0.05 vs *Atp6v1b1*<sup>+/+</sup> mice during the same period.

**Supplementary table 2. Weight, food intake and urinary values in *Atp6v1b1*<sup>+/+</sup> mice and *Atp6v1b1*<sup>-/-</sup> mice under normal diet and during an HCl load for 4 days**

|                                                    | Basal status           |                                         | 2 days HCl             |                                         | 4 days HCl             |                                         |
|----------------------------------------------------|------------------------|-----------------------------------------|------------------------|-----------------------------------------|------------------------|-----------------------------------------|
|                                                    | <i>C57BL6</i><br>(n=7) | <i>Atp6v1b1</i> <sup>-/-</sup><br>(n=7) | <i>C57BL6</i><br>(n=7) | <i>Atp6v1b1</i> <sup>-/-</sup><br>(n=7) | <i>C57BL6</i><br>(n=7) | <i>Atp6v1b1</i> <sup>-/-</sup><br>(n=5) |
| Weight (g)                                         | 22.7 ± 0.28            | 28.1 ± 0.5 <sup>#</sup>                 | 20.4 ± 0.2*            | 24.6 ± 0.3 <sup>*#</sup>                | 20.5 ± 0.3*            | 23.0 ± 0.3 <sup>*#</sup>                |
| Weight lose in % of body weight under basal status | 0.1 ± 0.6              | 0.4 ± 0.9                               | 10.3 ± 0.5*            | 13.0 ± 1.6 <sup>*#</sup>                | 11.9 ± 3.4*            | 18.8 ± 2.7 <sup>*#</sup>                |
| Food intake (g/24hrs/body weight)                  | 0.36 ± 0.01            | 0.36 ± 0.02                             | 0.28 ± 0.01*           | 0.22 ± 0.03*                            | 0.34 ± 0.04            | 0.26 ± 0.01 <sup>*#</sup>               |
| Water intake (ml/24hrs/body weight)                | 0.17 ± 0.05            | 0.05 ± 0.01 <sup>#</sup>                | 0.20 ± 0.05            | 0.20 ± 0.04*                            | 0.18 ± 0.03            | 0.23 ± 0.06*                            |
| Urine values                                       |                        |                                         |                        |                                         |                        |                                         |
| volume (ml/24 h)                                   | 2.6 ± 0.4              | 3.0 ± 0.1                               | 2.1 ± 0.2              | 4.7 ± 0.8 <sup>#</sup>                  | 3.1 ± 0.2              | 3.9 ± 1.2                               |
| creatinine excretion (μmol/24 h)                   | 3.7 ± 0.6              | 3.4 ± 0.2                               | 3.4 ± 0.4              | 1.8 ± 0.3 <sup>*#</sup>                 | 1.9 ± 0.2*             | 1.9 ± 0.7*                              |
| Urinary pH                                         | 6.2 ± 0.0              | 6.5 ± 0.1 <sup>#</sup>                  | 5.4 ± 0.1*             | 6.0 ± 0.0 <sup>*#</sup>                 | 5.7 ± 0.1*             | 6.0 ± 0.1 <sup>*#</sup>                 |
| UNH <sub>4</sub> /UCr (mEq/mmol)                   | 3.4 ± 0.3              | 11.3 ± 1.2 <sup>#</sup>                 | 51.0 ± 2.0*            | 56.7 ± 13.8*                            | 88.9 ± 6.2*            | 76.6 ± 7.2 <sup>*#</sup>                |
| UPi/UCr (mEq/mmol)                                 | 13.1 ± 1.1             | 11.6 ± 0.7                              | 14.3 ± 2.4             | 18.8 ± 3.2                              | 16.4 ± 2.6             | 22.7 ± 5.2                              |

\* p<0.05 vs baseline period in same genotype, # p<0.05 vs *Atp6v1b1*<sup>+/+</sup> mice during the same period.

**Supplementary table 3. Primers and probes sequences of the gene expressions evaluated by RT-qPCR**

| Gene                            | Accession number | Forward primer                                   | Reverse primer                               | Probe                                             |
|---------------------------------|------------------|--------------------------------------------------|----------------------------------------------|---------------------------------------------------|
| <b>Mouse</b><br><i>Atp6v1b1</i> | NM_134157        | 5'-<br>CCCAGTATGCTGAGATTGTCAACTTTAC<br>CCTCC -3' | 5'-<br>CCTGAACAATGGCCTTGGTC-3'               | 5'-<br>CCCAGTATGCTGAGATTGTCAACTTTAC<br>CCTCC-3'   |
| <b>Mouse</b><br><i>Atp6v1b2</i> | NM_007509        | 5'-<br>GCTGGTGATCCTGACGGACA TGAG-3'              | 5'-<br>CGTGCCGGTCGAGTGGAAGGTAGAAAC<br>GG-3'  | 5'-<br>CTGCGAGAGGTTTCAGCTG-3'                     |
| <b>Mouse</b><br><i>Atp6V0a4</i> | NM_080467        | 5'-<br>GACGGTGTCTCATCTATGTTTTGA-3'               | 5'-<br>TTTGCCCTGCATGGTCTTGTC-3'              | 5'-<br>TCTCTCCATTATCAAGAGCTCATGCCA -<br>3'        |
| <b>Mouse</b> <i>Hprt</i>        | NM_013556        | 5'-<br>TTATCAGACTGAAGAGCTACTGTAAGAT<br>C-3'      | 5'-<br>TTACCAGTGTCAATTATATCTTCAACAAT<br>C-3' | 5'-<br>TGAGAGATCATCTCCACCAATAACTTTT<br>ATGTCCC-3' |
| <b>Human</b><br><i>RhCG</i>     | NM_016321        | 5'- CTACCGACGCAACCTAGAGC-3'                      | 5'-GCTGTCCCCATGGTAGGATA-3                    | 5'-CTTTGCCATGATTGGCACCC-3'                        |
| <b>Human</b><br><i>ATP6V1B1</i> | NM_001692        | 5'-GAGATGATTCAGACGGGCATTT-3'                     | 5'-CTGGTGAAGAAGTCCAAGGC-3'                   | 5'-AATGAGATTGCCGCTCAGAT-3'                        |
| <b>Human</b><br><i>ATP6V1B2</i> | NM_001693        | 5''-TGAAGGGACTTCAGGTATAGATGC-3'                  | 5'-GGAAGTCTTCGGCCAGTACA-3'                   | 5'-TGGTCGGGTATTCAATGGAT-3'                        |
| <b>Human</b><br><i>ATP6V0A1</i> | NM_001130020     | 5'-TTCCTGGAACCTGACCGAATTA-3'                     | 5'-AGGAGTGCCTCTCCCATCT-3'                    | 5'-GAGGCTGAATTGCATCATCA-3'                        |
| <b>Human</b><br><i>HPRT</i>     | NM_000185        | 5'-AAGGGTGTTACGTTTAT-3'                          | 5'-TATTTCTGTGCGTGAT-3'                       | 5'- ACCTCCTTGGGATCTATTTACCG -3'                   |



**A**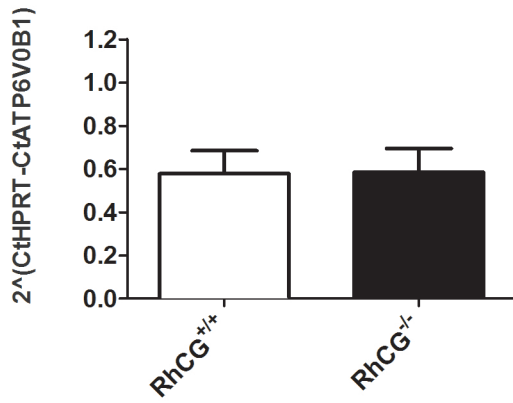**B**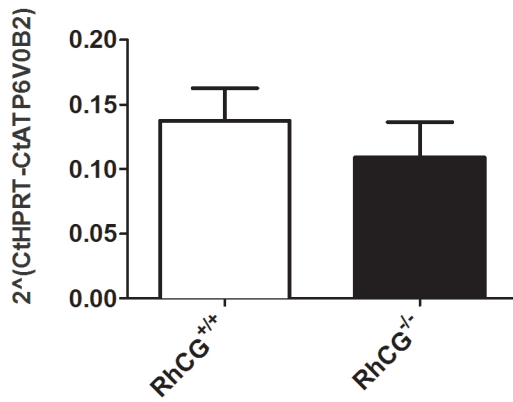**C**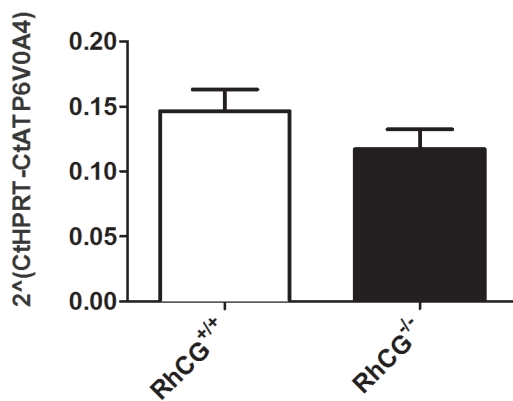

Supplement: NIHMS986548-supplement-1.pdf [file NIHMS986548-supplement-1.pdf]
